# Supplementary figures and images for: [Retracted] NREM Sleep EEG Characteristics Correlate to the Mild Cognitive Impairment in Patients with Parkinsonism
Source: Hindawi journal article supplement (doi:10.1155/2021/5561974), 2021-01-01

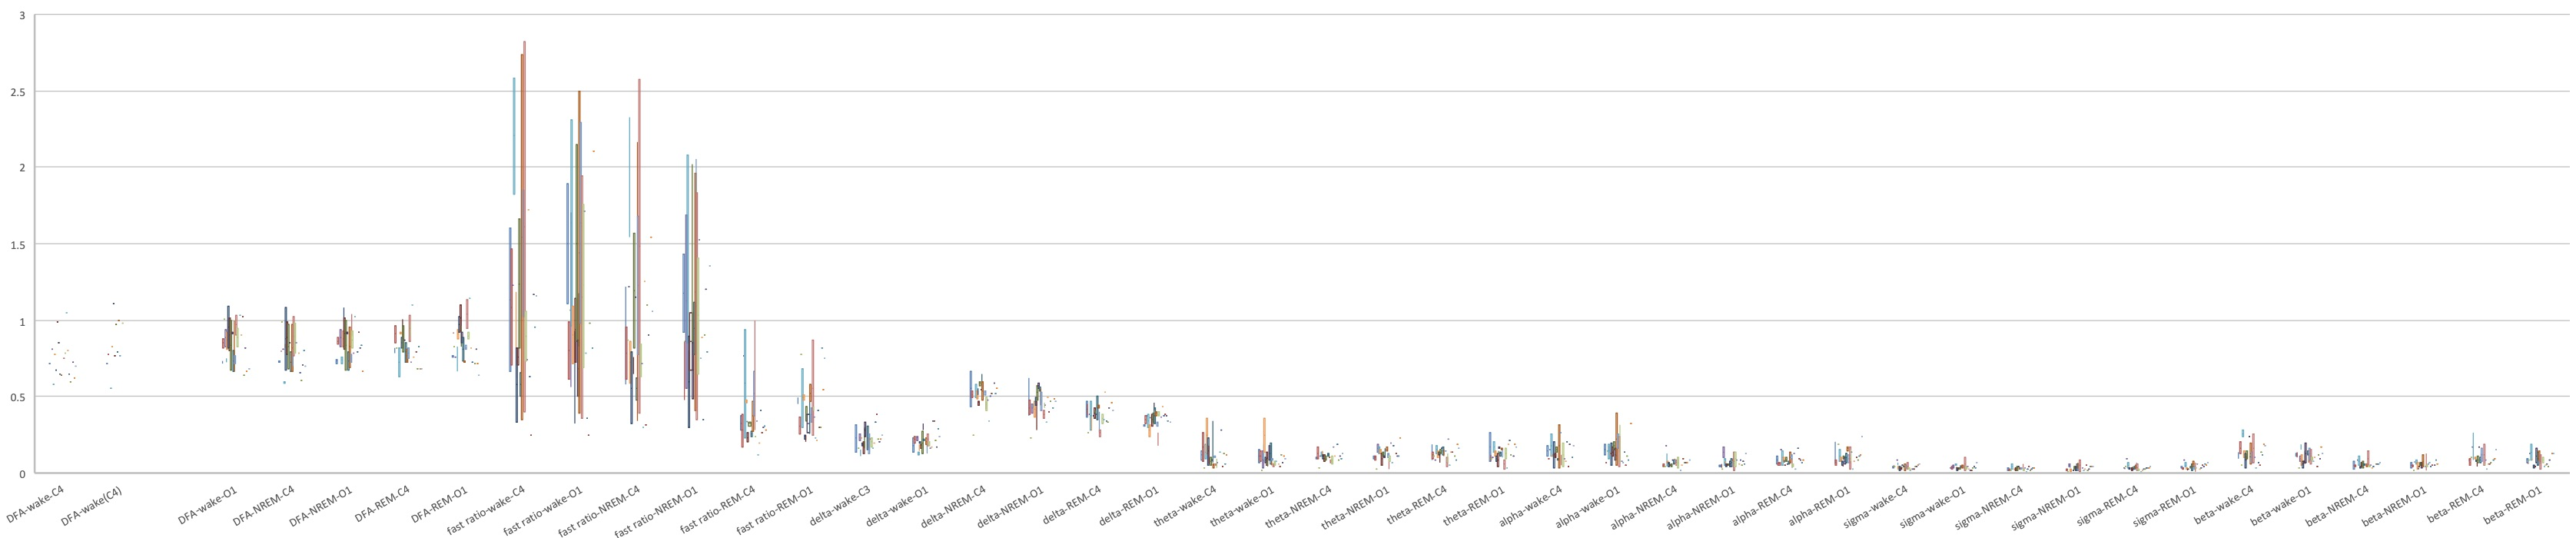

Supplement: f1 [file 5561974.f1.docx]
